# Supplementary material for: Processed pseudogenes acquired somatically during cancer development
Source: PubMed Central journal article supplement (PMC3996531; doi:10.1038/ncomms4644), 2014-04-09
Supplement: ncomms4644-s1.pdf [file ncomms4644-s1.pdf]

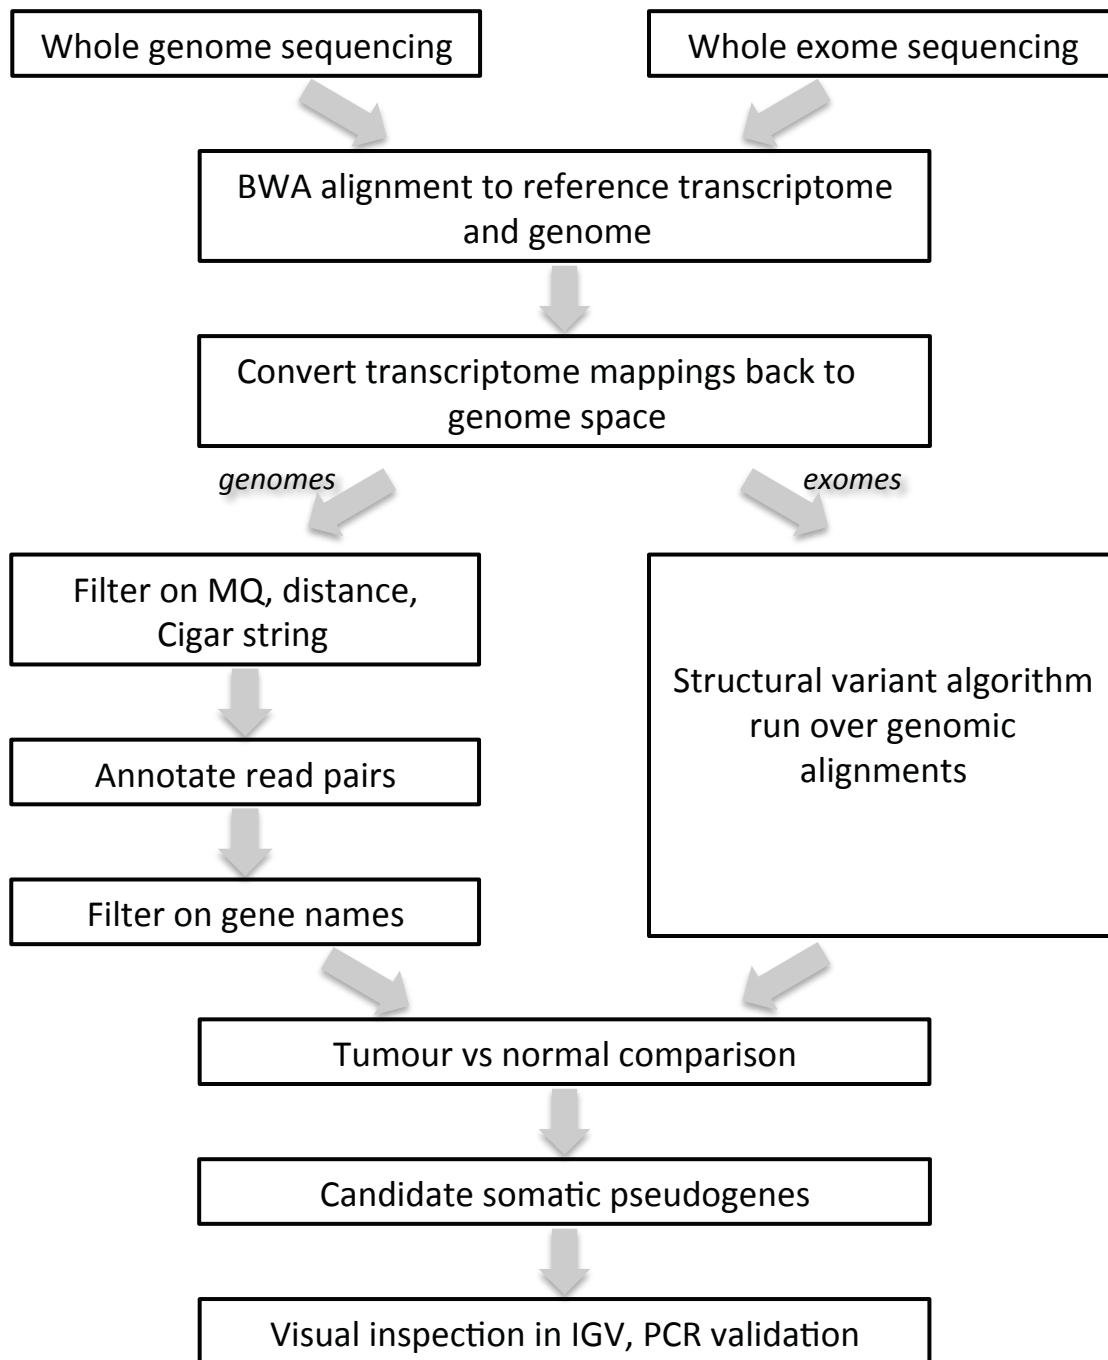

**Supplementary Figure 1.** Bioinformatic analysis of whole-genome shotgun sequencing and exome pull-down sequencing data.

## PCR validations of pseudogenes identified by bioinformatics algorithm

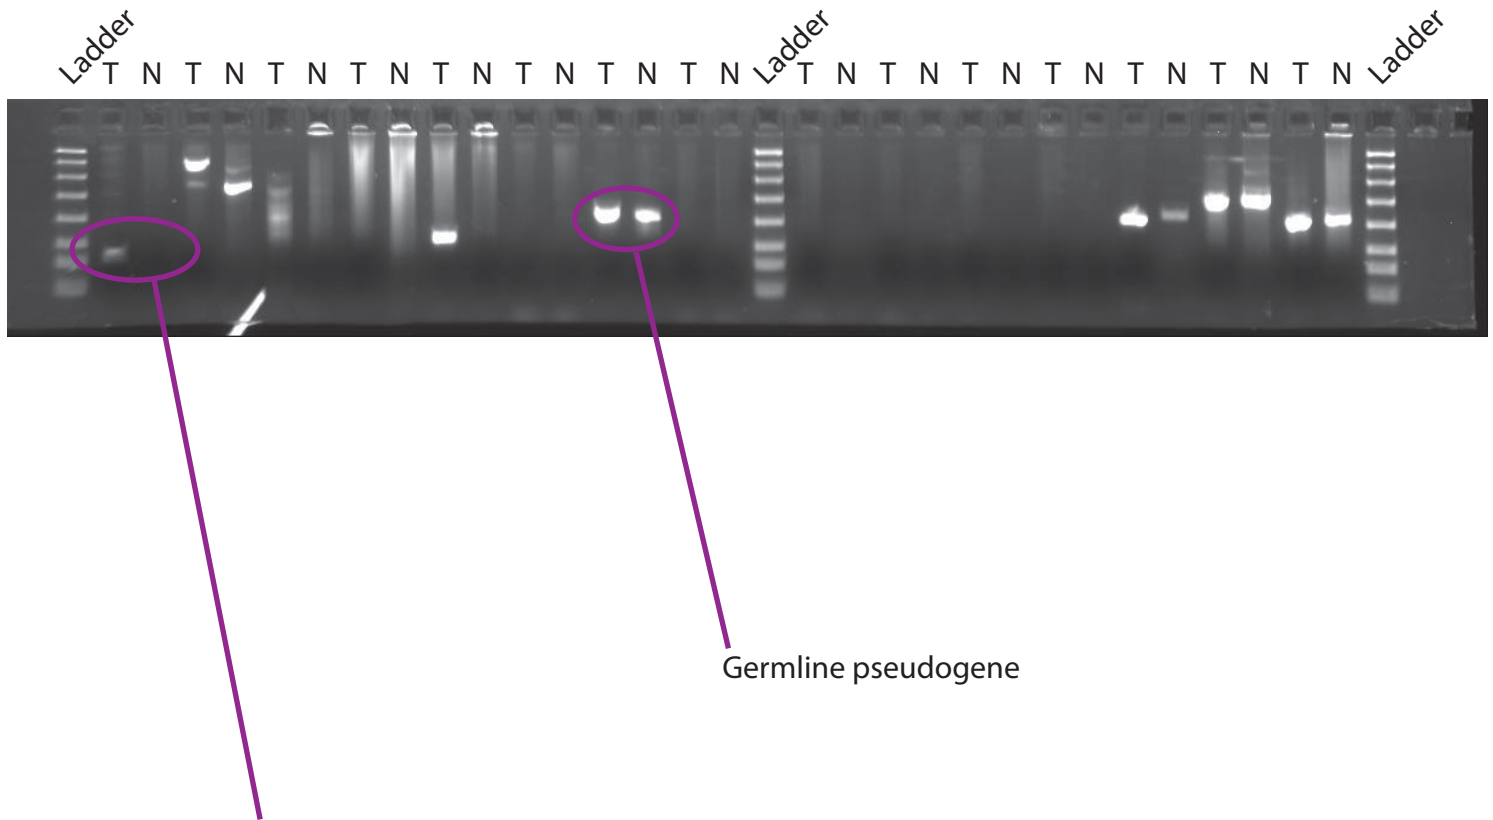

Example of a somatic pseudogene (*CAST* from Supplementary Figure 3b)  
Note the band present in the tumour (T) lane, but absent from normal (N)

**Supplementary Figure 2.** PCR validations of somatic pseudogenes. An example gel is shown of PCR validations of somatic pseudogenes. Each PCR was performed on tumour (T) and matched normal (N) DNA, and run on an agarose gel in adjacent lanes. Somatic pseudogenes are recognized by the presence of a band in the tumour lane that is absent from the matched normal DNA, whereas germline pseudogenes have bands present in PCRs from tumour and normal DNA.

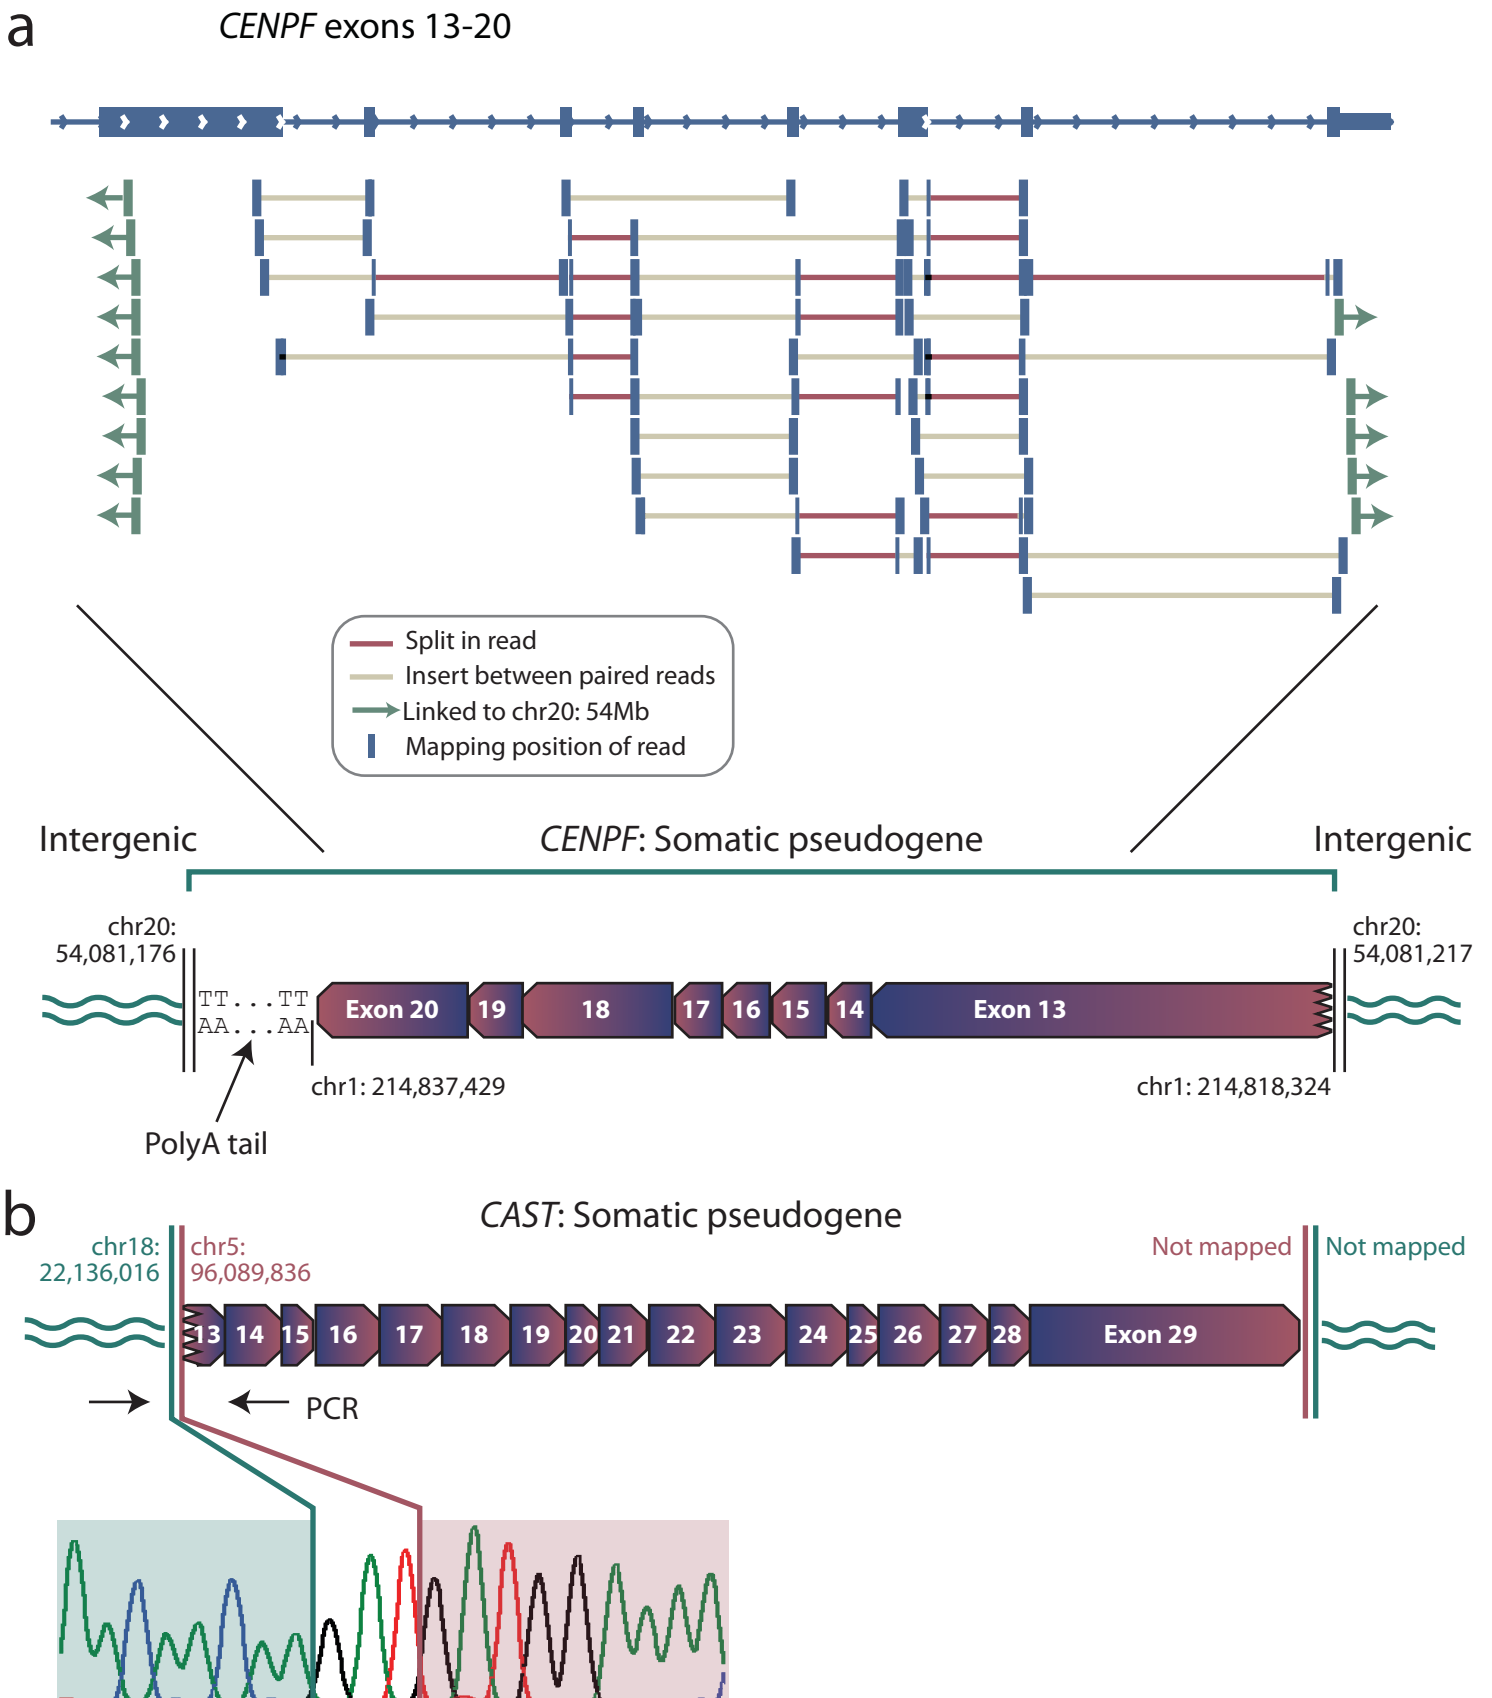

**Supplementary Figure 3.** Somatic pseudogenes. (a) A somatic *CENPF* pseudogene in a non-small cell lung cancer. Sequencing reads from high-coverage whole genome shotgun sequencing of the tumour reveal a series of split reads (red) crossing the four canonical exon-exon splice junctions in the gene. In addition, read pairs map to adjacent exons with an insert size larger than expected (light brown). At either end of the gene, read-pairs linking to chr20 could be identified, revealing that the *CENPF* pseudogene is inserted into an intergenic region with an intact polyA tail and a target-site deletion of 40bp. (b) A somatic *CAST* pseudogene in a colorectal cancer. The 5' insertion point was confirmed as somatic by PCR and capillary sequencing across an exon-exon junction and insertion site.

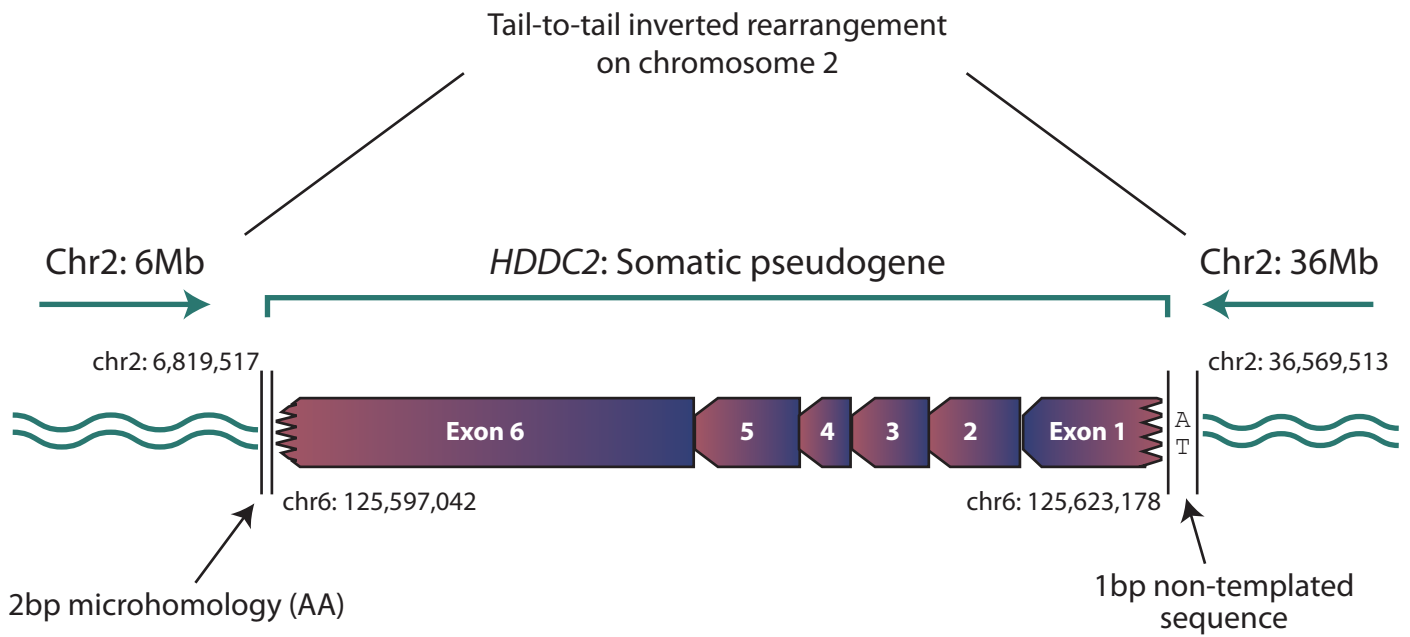

**Supplementary Figure 4.** A somatic pseudogene was identified in which the 5' and 3' insertion points were ~30Mb apart on chromosome 2 and in an inverted orientation. This suggests that the pseudogene was inserted in the breakpoint of a genomic rearrangement during DNA repair.

**a**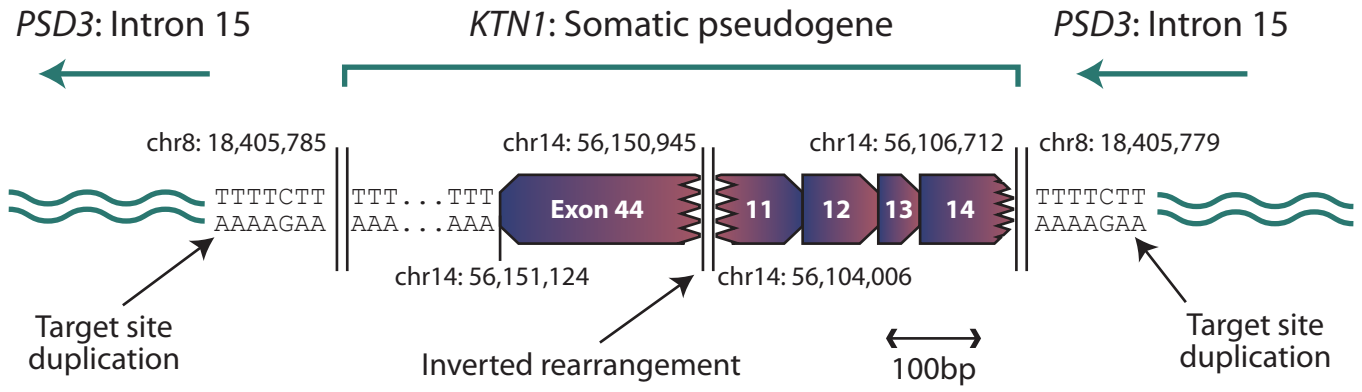**b**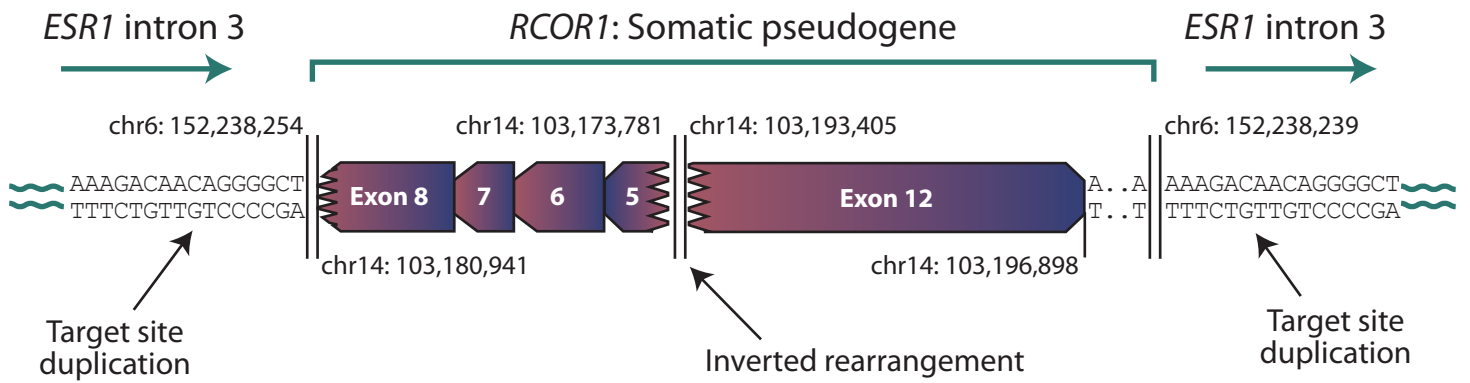

**Supplementary Figure 5.** Examples of somatic pseudogenes with internal inverted rearrangements.

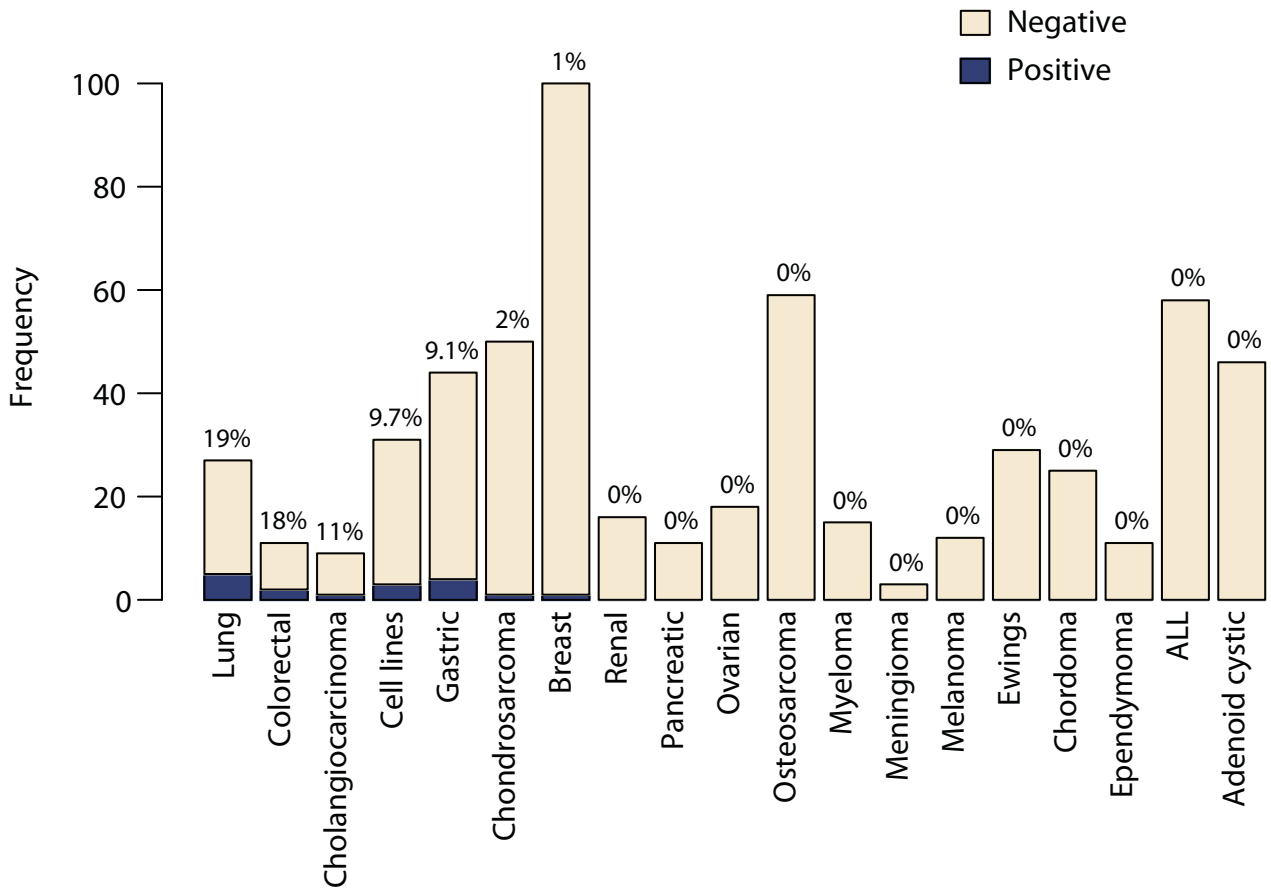

**Supplementary Figure 6.** Distribution of samples positive (blue) or negative (light brown) for somatic pseudogenes across different tissue types.

a

***HDAC1* somatic pseudogene in a lung cancer**

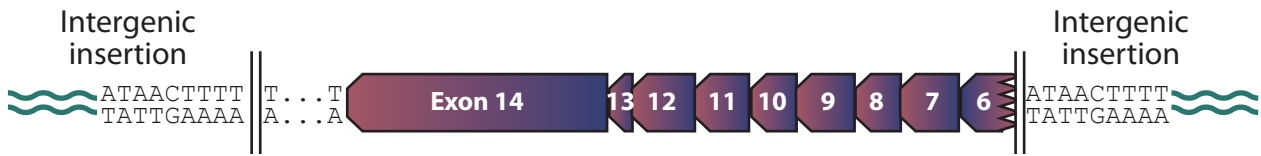

***HDAC1* somatic pseudogene in a colorectal cancer**

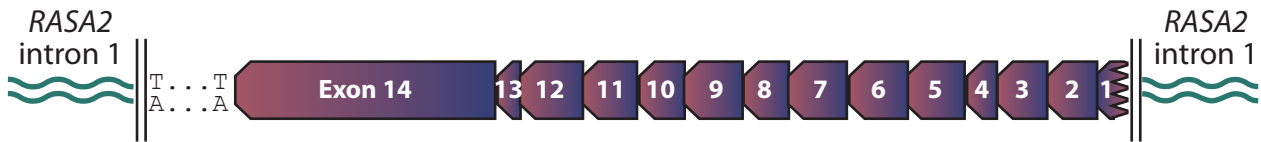

b

***AKR1C1* somatic pseudogene in a lung cancer**

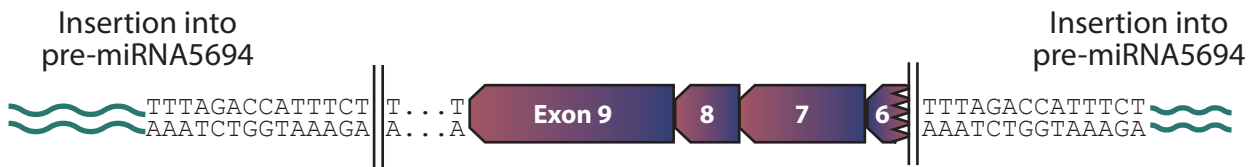

***AKR1C3* somatic pseudogene in a lung cancer**

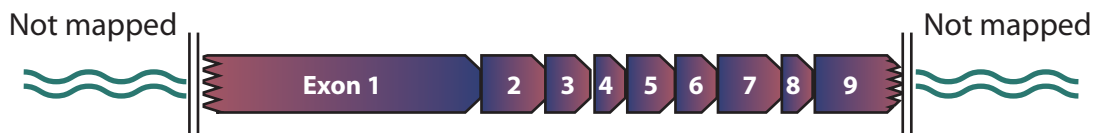

***FMO3* somatic pseudogene in a lung cancer**

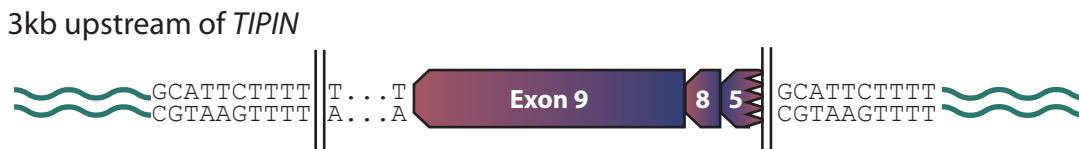

**Supplementary Figure 7.** Recurrence of somatic pseudogenes. (a) Three somatic pseudogenes involving genes encoding enzymes that metabolise chemicals in cigarette smoke (*AKR1C1*, *AKR1C3* and *FMO3*) observed in lung cancers from smokers. (b) Two somatic *HDAC1* pseudogenes, one full-length in a colorectal cancer and one 5' truncated in a lung cancer. The different insertion points were confirmed by PCR.

a

*KTN1*: Somatic pseudogene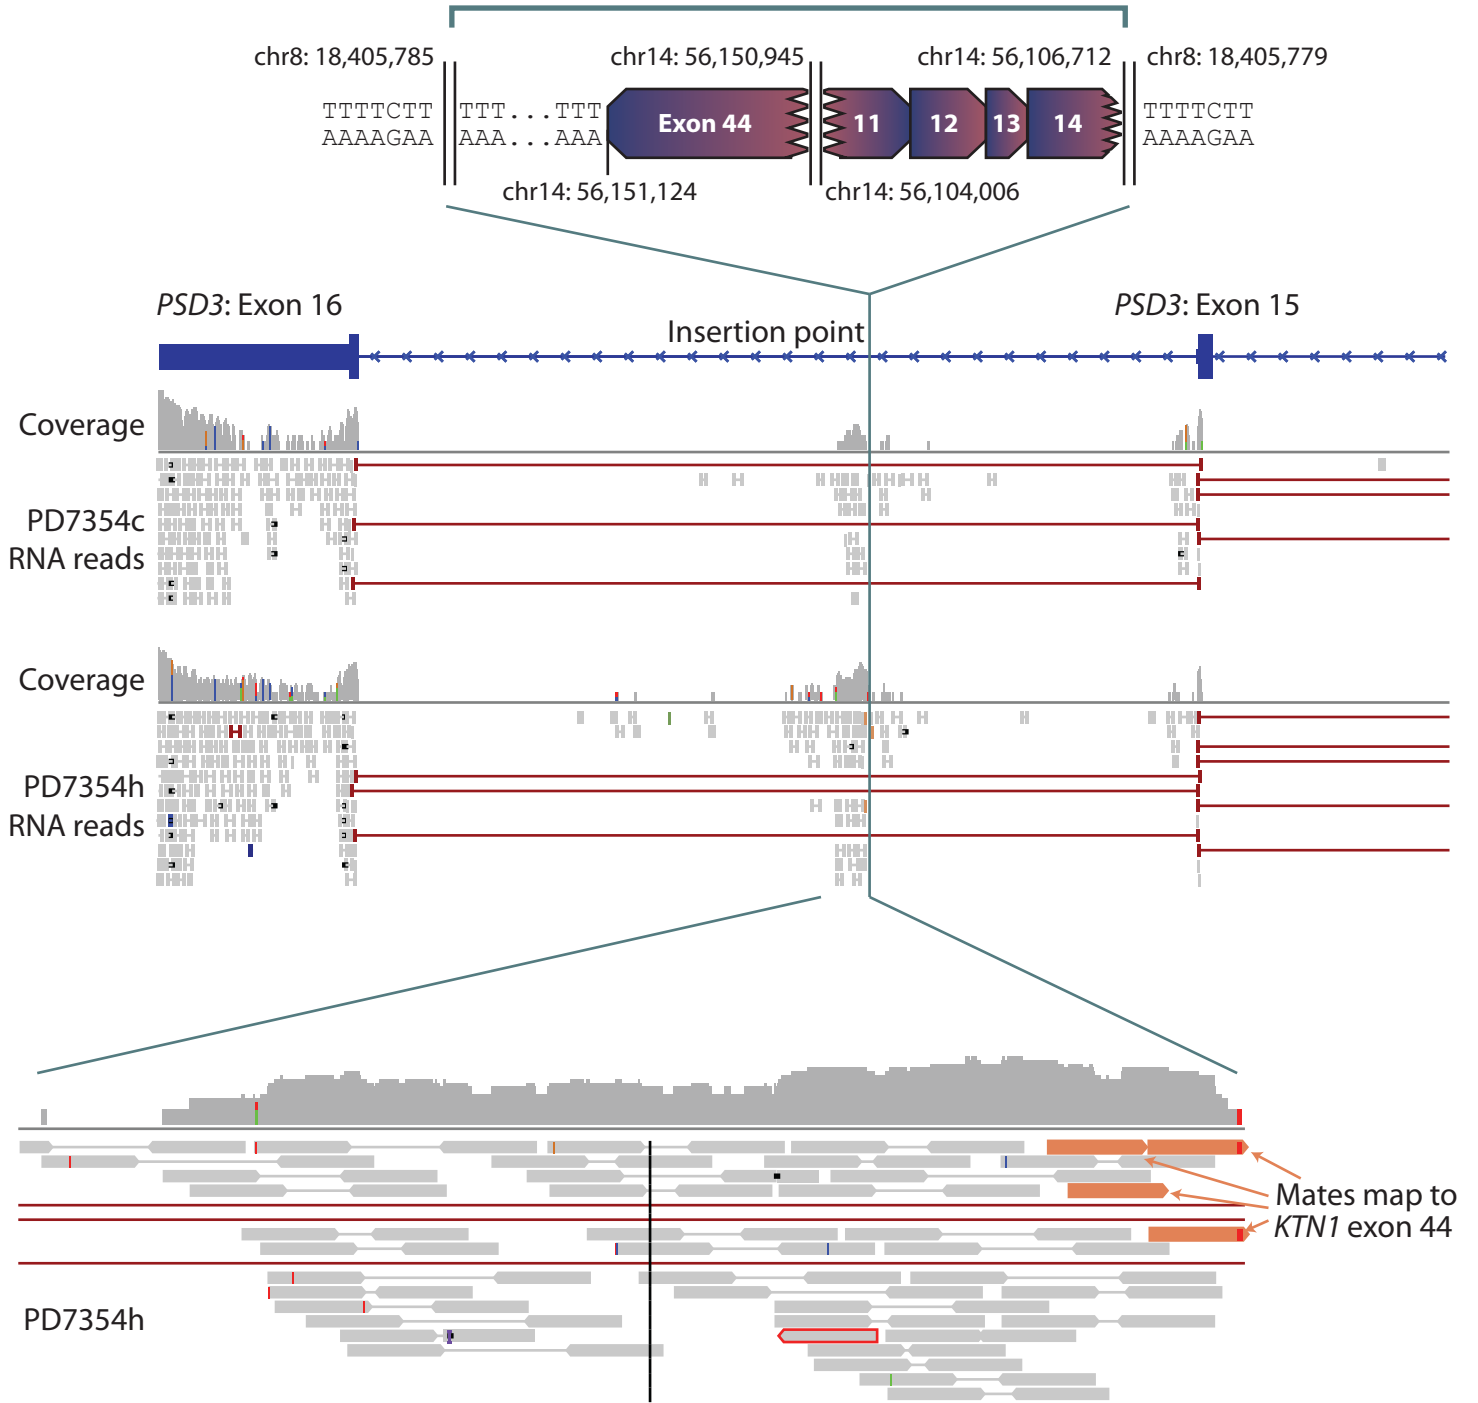

b

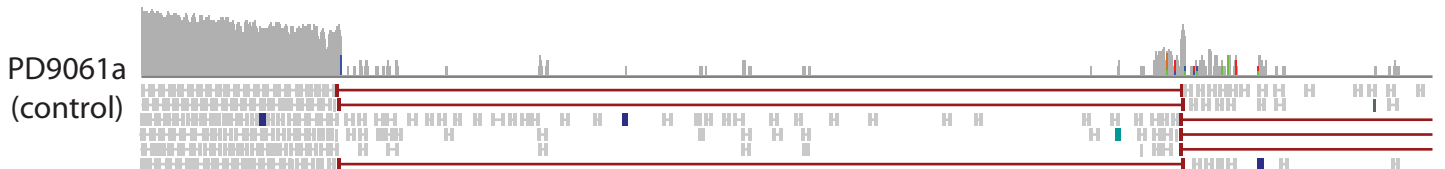

**Supplementary Figure 8.** Expression of a *KTN1* pseudogene inserted into the last intron of *PSD3* in a primary squamous cell lung cancer. (A) Two RNA samples were available from different time-points during the evolution of this cancer –the somatic pseudogene was present in genomic DNA at both time-points. In the RNA-sequencing data at both time-points (PD7354c and PD7354h), a cluster of read-pairs maps to the *PSD3* intron immediately adjacent to the insertion point (vertical green line). We find four read-pairs (in orange) which align with one end in the *PSD3* intron and the other end in the *KTN1* 3' UTR, shown in the zoomed-in image. (B) No such expression is seen in another cancer (PD9061a).



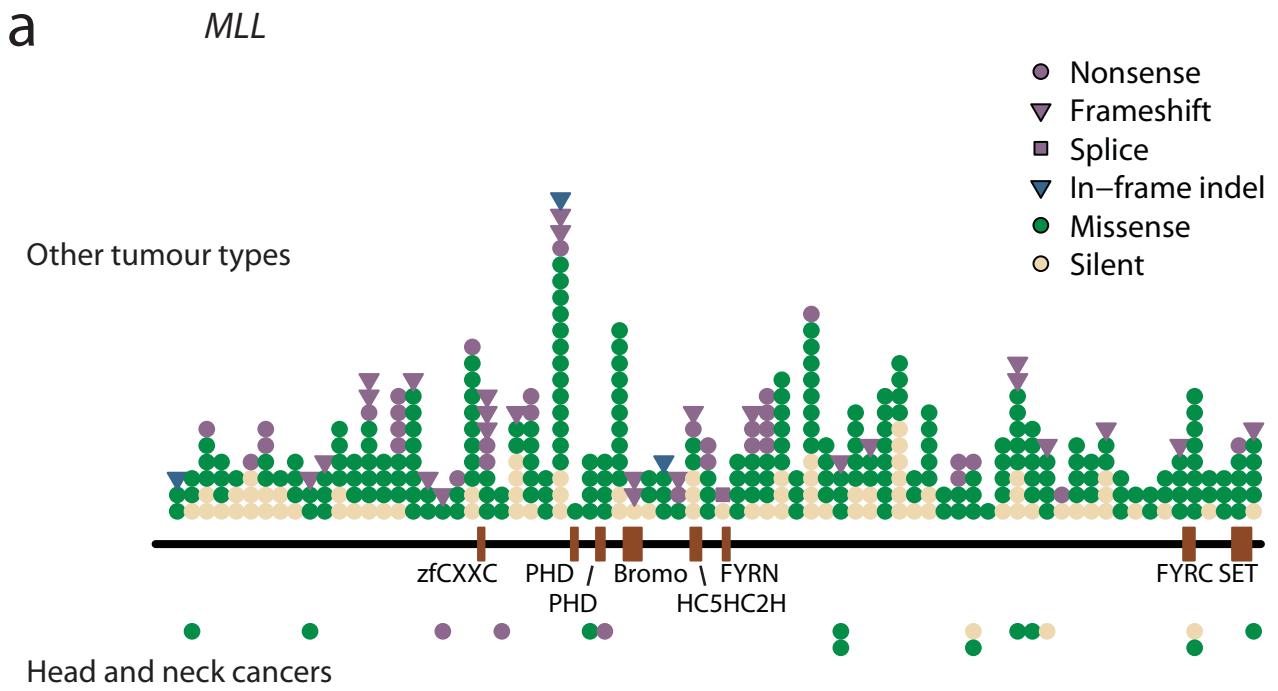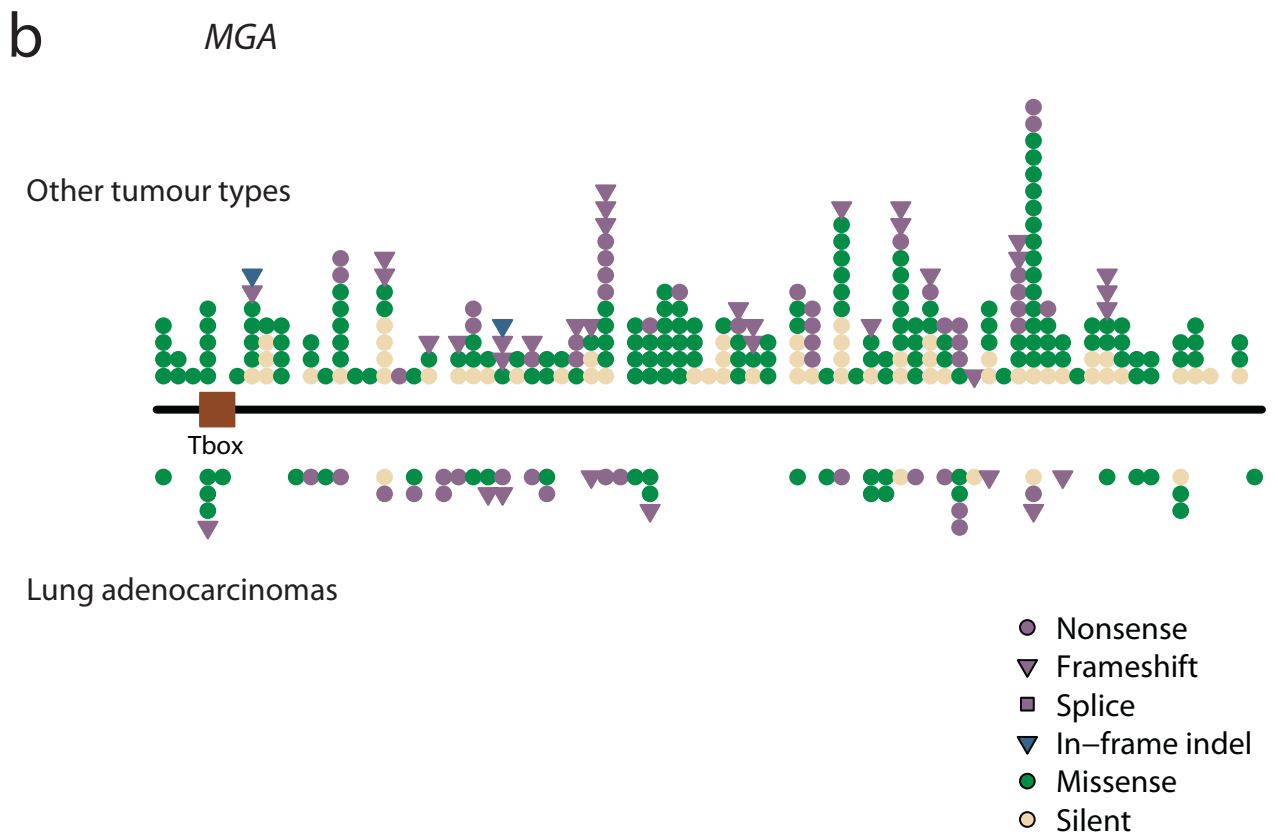

**Supplementary Figure 9.** Patterns of mutations observed in (a) *MLL* and (b) *MGA* from a compendium of 7,651 publicly available exomes from cancers and matched normal samples. *MGA* shows a statistically significant excess of nonsense mutations ( $q=4 \times 10^{-8}$ ) by Poisson regression (reference 31, main text) based on 58 nonsense mutations compared to 58 synonymous mutations. This indicates it is a likely tumour suppressor gene.

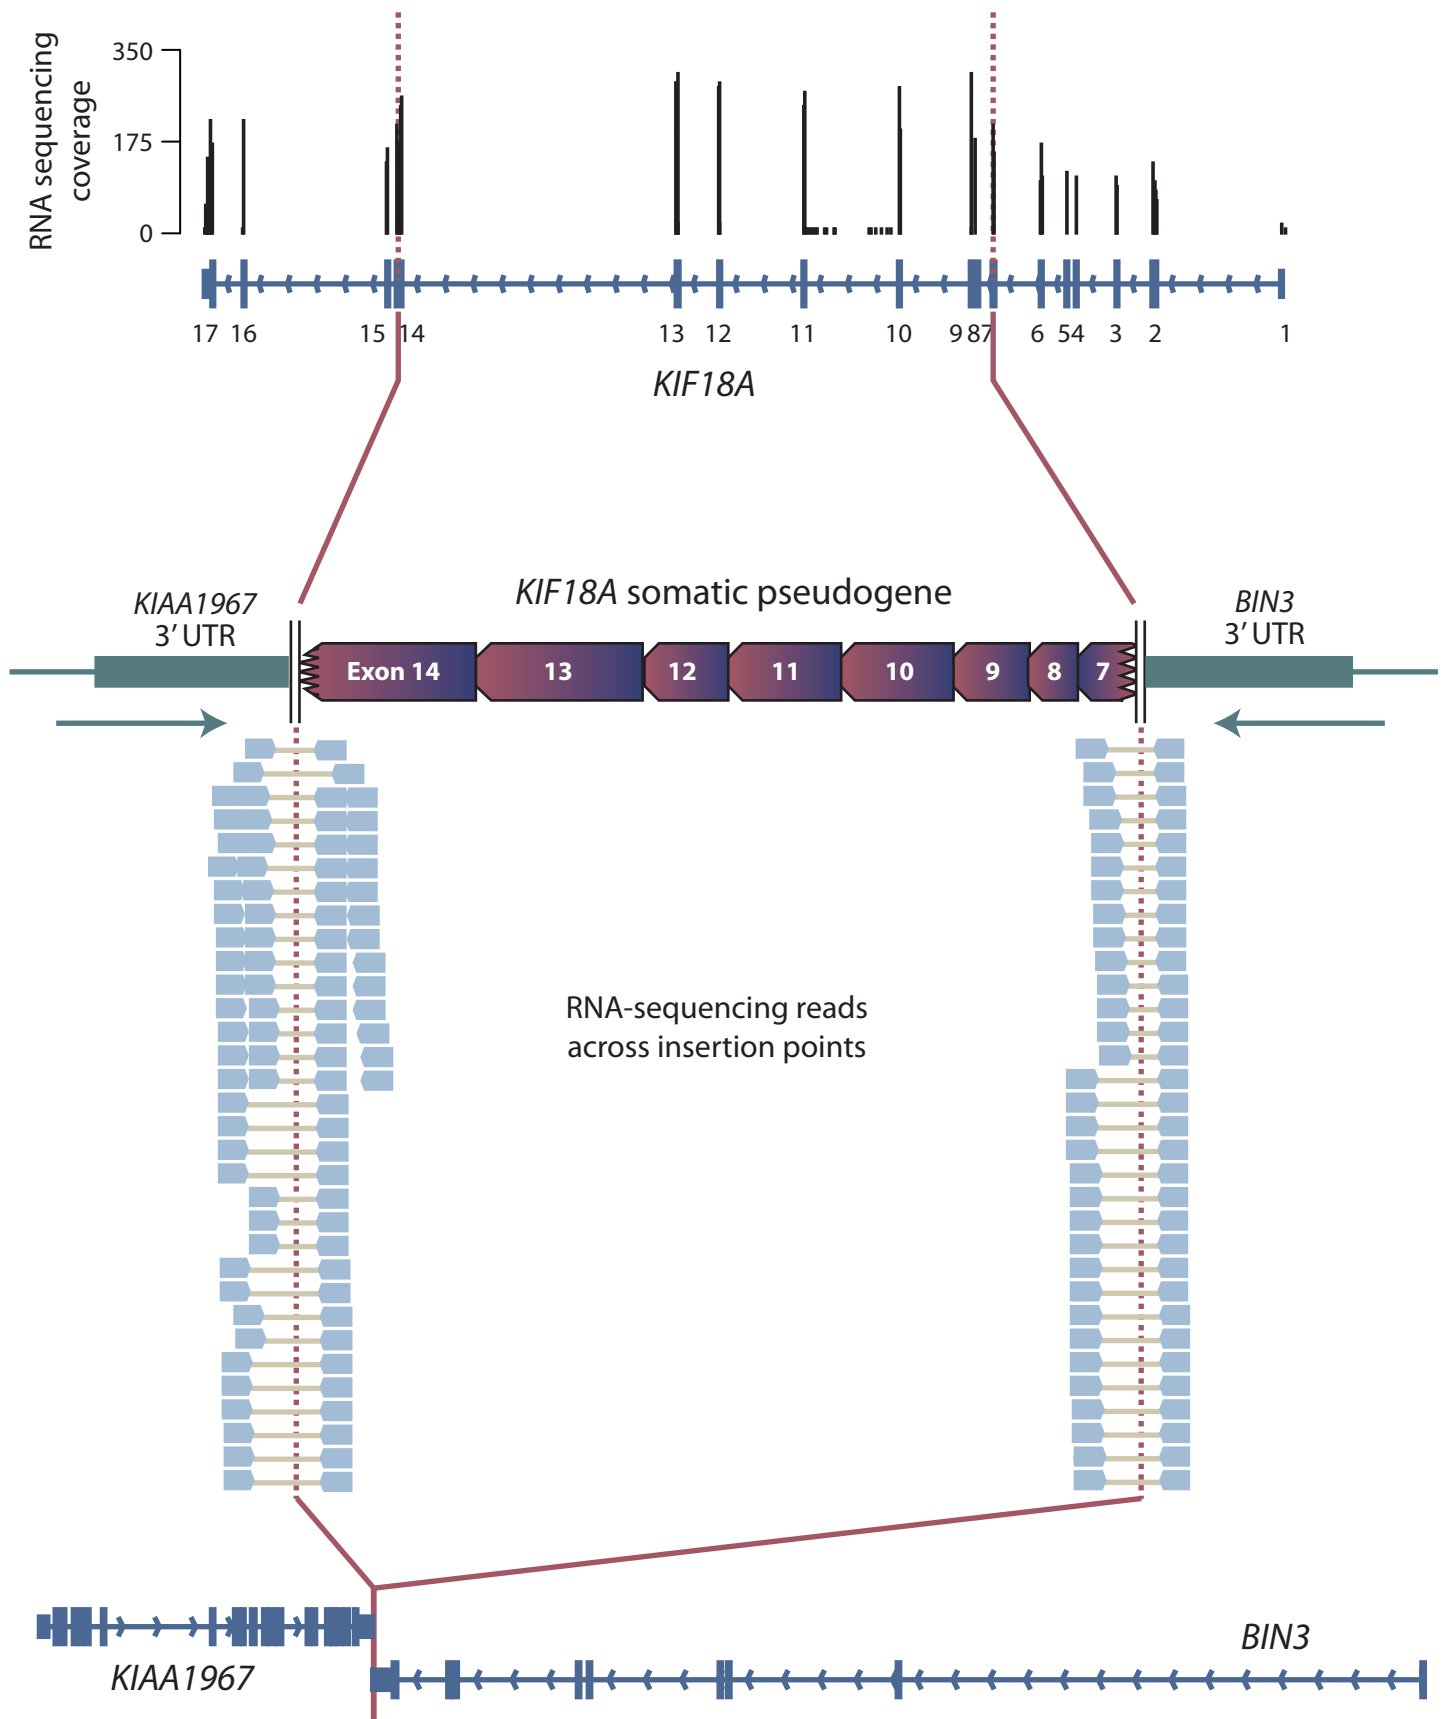

**Supplementary Figure 10.** RNA-seq of the *KIF18A* somatic pseudogene. Multiple read pairs support expression of the junctions between *KIAA1967*-*KIF18A* and *BIN3*-*KIF18A*.

## Supplementary Table 1

| Sample    | Type      | Cancer type        | Data type        | Read length (bp) | Insert size (bp) | Depth       | Matched normal depth |
|-----------|-----------|--------------------|------------------|------------------|------------------|-------------|----------------------|
| PD4226a   | Primary   | Breast             | Exome            | 76               | 165              | 78% at >30x | 78% at >30x          |
| PD6037a   | Primary   | Cholangiocarcinoma | Exome            | 74               | 110              | 52% at >30x | 54% at > 30x         |
| PD6368a   | Primary   | Chondrosarcoma     | Exome            | 75               | 160              | 82% at >30x | 83% at >30x          |
| PD7261a   | Primary   | Colorectal         | Exome            | 75               | 165              | 79% at >30x | 70% at > 30x         |
| PD9061a   | Primary   | Colorectal         | Exome            | 75               | 148              | 76% at >30x | 26% at > 30x         |
| PD6022a   | Primary   | Gastric            | Exome            | 74               | 120              | 60% at >30x | 60% at >30x          |
| PD6377a   | Primary   | Gastric            | Low depth genome | 50               | 322              | 4.5x        | PCR only             |
| PD6384a   | Primary   | Gastric            | Low depth genome | 50               | 315              | 5.5x        | PCR only             |
| PD6388a   | Primary   | Gastric            | Low depth genome | 50               | 377              | 5.3x        | PCR only             |
| PD7354c   | Primary   | Lung               | Genome           | 100              | 313              | 30.5x       | 31.9x                |
| PD7354h   | Primary   | Lung               | Genome           | 100              | 417              | 30.4x       | 31.9x                |
| PD7354k   | Primary   | Lung               | Genome           | 100              | 322              | 30.1x       | 31.9x                |
| PD7354r   | Primary   | Lung               | Genome           | 100              | 304              | 43.6x       | 31.9x                |
| PD7355a   | Primary   | Lung               | Genome           | 100              | 316              | 39.0x       | 31.4x                |
| PD7356c   | Primary   | Lung               | Genome           | 100              | 316              | 31.3x       | 33.3x                |
| PD7356i   | Primary   | Lung               | Genome           | 100              | 298              | 31.3x       | 33.3x                |
| PD4861b   | Primary   | Lung               | Low depth genome | 50               | 293              | 5.7x        | 2.0x                 |
| PD4864b   | Primary   | Lung               | Low depth genome | 50               | 324              | 6.3x        | 2.0x                 |
| LB771-HNC | Cell line | Head & neck        | Exome            | 75               | 165              | 81% at >30x | 84% at >30x          |
| NCI-H2009 | Cell line | Lung               | Exome            | 75               | 165              | 73% at >30x | 81% at > 30x         |
| NCI-H2087 | Cell line | Lung               | Exome            | 75               | 165              | 69% at >30x | 80% at > 30x         |

## Supplementary Table 2

| <b>Tumour type</b>            | <b>Exome (positive)</b> | <b>Genome (positive)</b> | <b>Total (positive)</b> | <b>Prevalence</b> |
|-------------------------------|-------------------------|--------------------------|-------------------------|-------------------|
| Adenoid cystic                | 46 (0)                  | 0                        | 46 (0)                  | 0 %               |
| Acute lymphoblastic leukaemia | 58 (0)                  | 0                        | 58 (0)                  | 0 %               |
| Ependymoma                    | 11(0)                   | 0                        | 11 (0)                  | 0 %               |
| Breast                        | 101 (1)                 | 69 (0)                   | 170 (1)                 | 1 %               |
| Cholangiocarcinoma            | 9 (1)                   | 0                        | 9 (1)                   | 11 %              |
| Chondrosarcoma                | 50 (1)                  | 0                        | 50 (1)                  | 2 %               |
| Chordoma                      | 25 (0)                  | 0                        | 25 (0)                  | 0 %               |
| Colorectal                    | 11 (2)                  | 0                        | 11 (2)                  | 18 %              |
| Ewing's sarcoma               | 29 (0)                  | 0                        | 29 (0)                  | 0 %               |
| Gastric                       | 14 (1)                  | 30 (3)                   | 44 (4)                  | 9 %               |
| Lung                          | 0                       | 27 (5)                   | 27 (5)                  | 19 %              |
| Melanoma                      | 12 (0)                  | 0                        | 12 (0)                  | 0 %               |
| Meningioma                    | 3 (0)                   | 0                        | 3 (0)                   | 0 %               |
| Myeloma                       | 15 (0)                  | 0                        | 15 (0)                  | 0 %               |
| Osteosarcoma                  | 59 (0)                  | 15 (0)                   | 59 (0)                  | 0 %               |
| Ovarian                       | 0                       | 18 (0)                   | 18 (0)                  | 0 %               |
| Pancreatic                    | 0                       | 11 (0)                   | 11 (0)                  | 0 %               |
| Renal                         | 16 (0)                  | 0                        | 16 (0)                  | 0 %               |
| Cell lines                    | 31 (3)                  | 0                        | 31 (3)                  | 14%               |
| <b>TOTAL</b>                  | <b>490 (9)</b>          | <b>170 (8)</b>           | <b>660 (17)</b>         | <b>3 %</b>        |

### Supplementary Table 3

| Sample       | Gene  | Exons involved | Insertion site      | Pseudogene into   |                  |                          |                   |
|--------------|-------|----------------|---------------------|-------------------|------------------|--------------------------|-------------------|
|              |       |                |                     | 5' Insertion Site | 5' IS            | Microhomology / NTS      | 3' Insertion Site |
| TCGA-43-3920 | SSRP1 | 3-17           | Intergenic          | chr17:34,610,045  | chr11:57,102,120 | 4bp microhomology (ATCA) | chr17:34,610,035  |
| TCGA-60-2698 | KRT6A | 1-4; 4-9       | In intron 9 of CTIF | chr18:46,376,578  | chr12:52,880,960 | polyA tail               | chr18:46,376,566  |
| TCGA-60-2713 | NOL7  | 1-8            | Intergenic          | chr19:21,080,183  | chr6:13,615,594  | 7bp NTS (CAGGCTCT)       | chr19:21,079,840  |
| TCGA-60-2722 | KRT6A | 1-9            | Intergenic          | chr14:55,576,932  | chr12:52,887,038 | 5bp NTS (GCGAG)          | Not mapped        |
| TCGA-38-4630 | CNIH4 | 1-4            | In intron 4 of DDO  | chr6:110,725,517  | chr1:224,544,589 | 1bp NTS (C)              | chr6:110,725,506  |

| <b>Pseudogene into</b> | <b>3' IS</b> | <b>Microhomology / NTS</b> | <b>Target site duplication</b> | <b>Internal rearrangement</b> | <b>Microhomology / NTS</b>                         |
|------------------------|--------------|----------------------------|--------------------------------|-------------------------------|----------------------------------------------------|
| chr11:57,093,466       |              | polyA tail                 | ATCAAGCTCTT                    |                               |                                                    |
| chr12:52,884,672       |              | 1 bp microhomology (G)     | GGCCTTCCTTTT                   | Inverted exons 1;4            | 1bp microhomolog <sup>y</sup> 52884672 to 52886571 |
| chr6:13,621,127        |              | polyA tail                 | 200bp duplication              |                               |                                                    |
| Not mapped             |              | Not mapped                 | Not mapped                     |                               |                                                    |
| chr1:224,563,688       |              | polyA tail                 | TCCTTTGTCTT                    |                               |                                                    |

## Supplementary Table 4

| <b>Pseudogene</b> | <b>Data type</b> | <b>Depth</b> | <b>Insertion junctions</b> | <b>splice junctions</b> |
|-------------------|------------------|--------------|----------------------------|-------------------------|
| KRT6A             | Exome            | 81% at >30x  | 0                          | 121                     |
| KRT6A             | Genome           | 41x          | 13                         | 48                      |
| KIF18A            | Exome            | 81% at >30x  | 9                          | 90                      |
| KIF18A            | Genome           | 41x          | 27                         | 29                      |
| C9orf41           | Exome            | 73% at >30x  | 0                          | 155                     |
| C9orf41           | Genome           | 46x          | 38                         | 54                      |
| PTPN12            | Exome            | 73% at >30x  | 12                         | 171                     |
| PTPN12            | Genome           | 46x          | 13                         | 43                      |
| IBTK              | Exome            | 73% at >30x  | 0                          | 636                     |
| IBTK              | Genome           | 46x          | 24                         | 244                     |
| ARPC5             | Exome            | 69% at >30x  | 4                          | 55                      |
| ARPC5             | Genome           | 40x          | 21                         | 23                      |
